# Supplementary material
Source: HighWire-hosted journal article supplement (https://cancerres.aacrjournals.org/content/suppl/2008/10/24/68.21.8661)

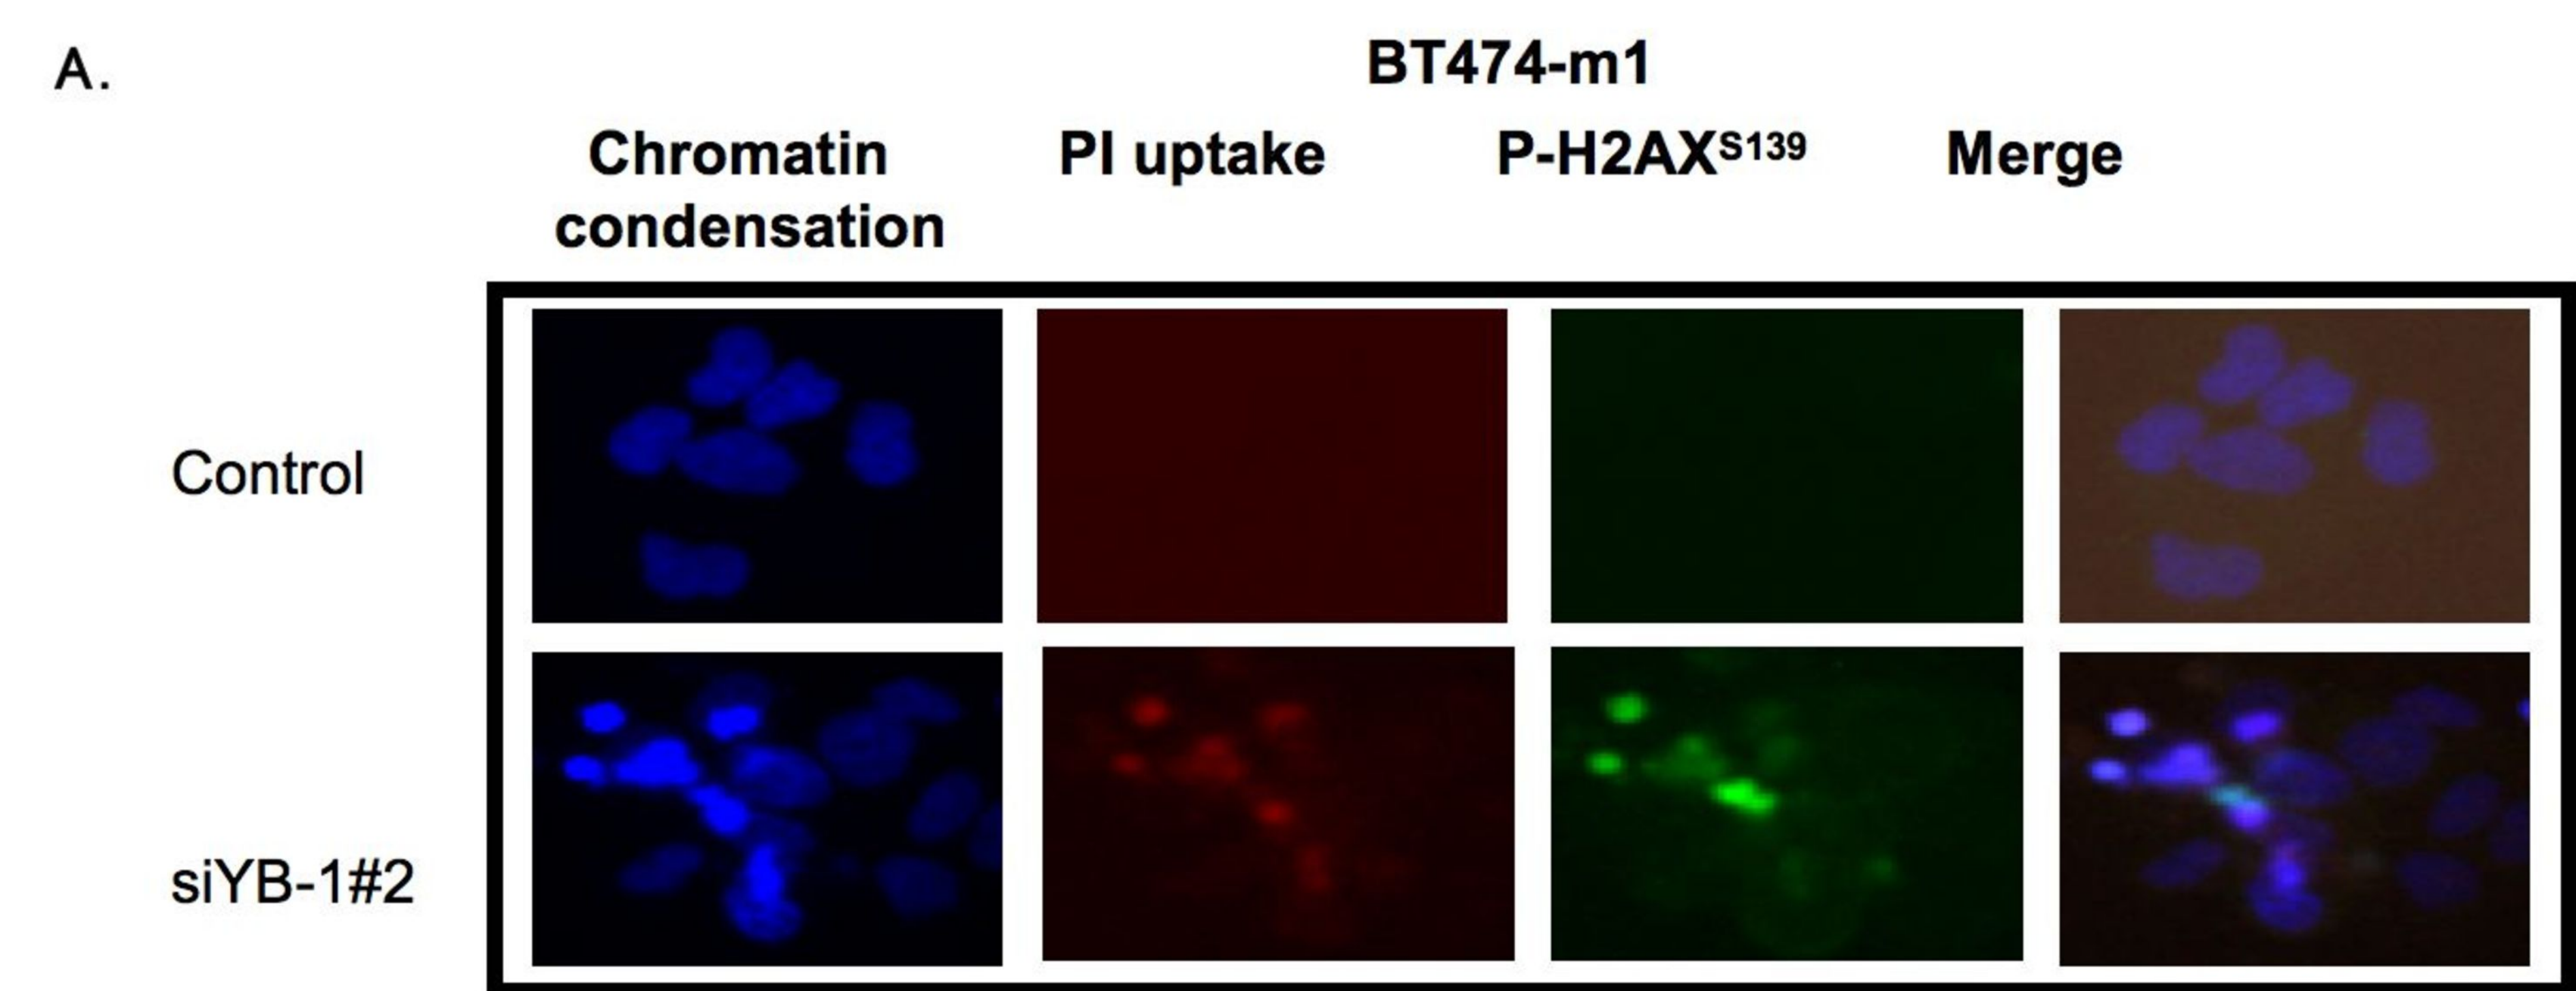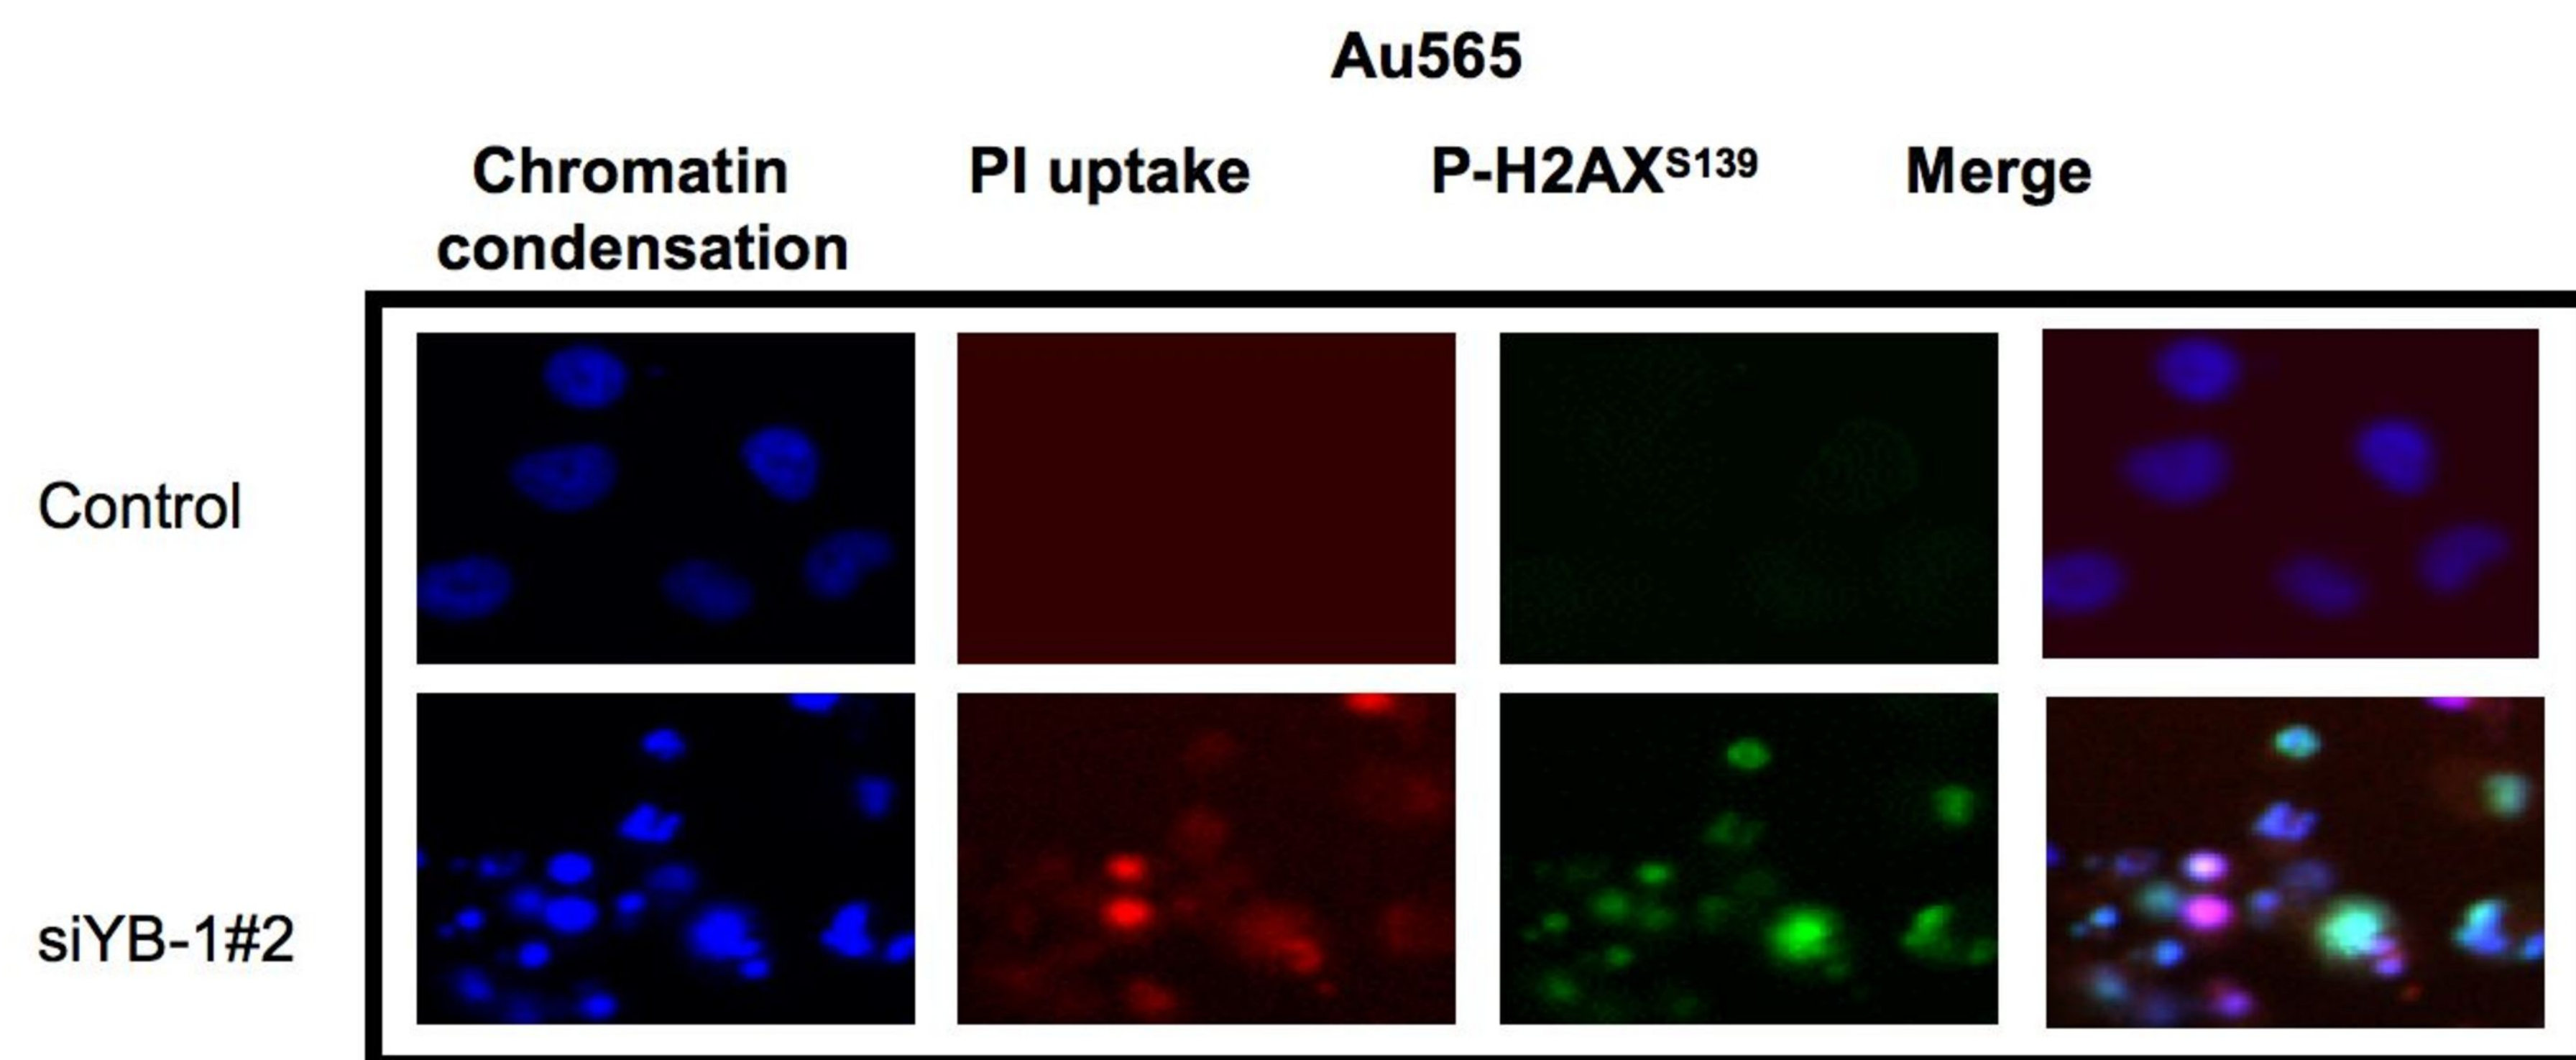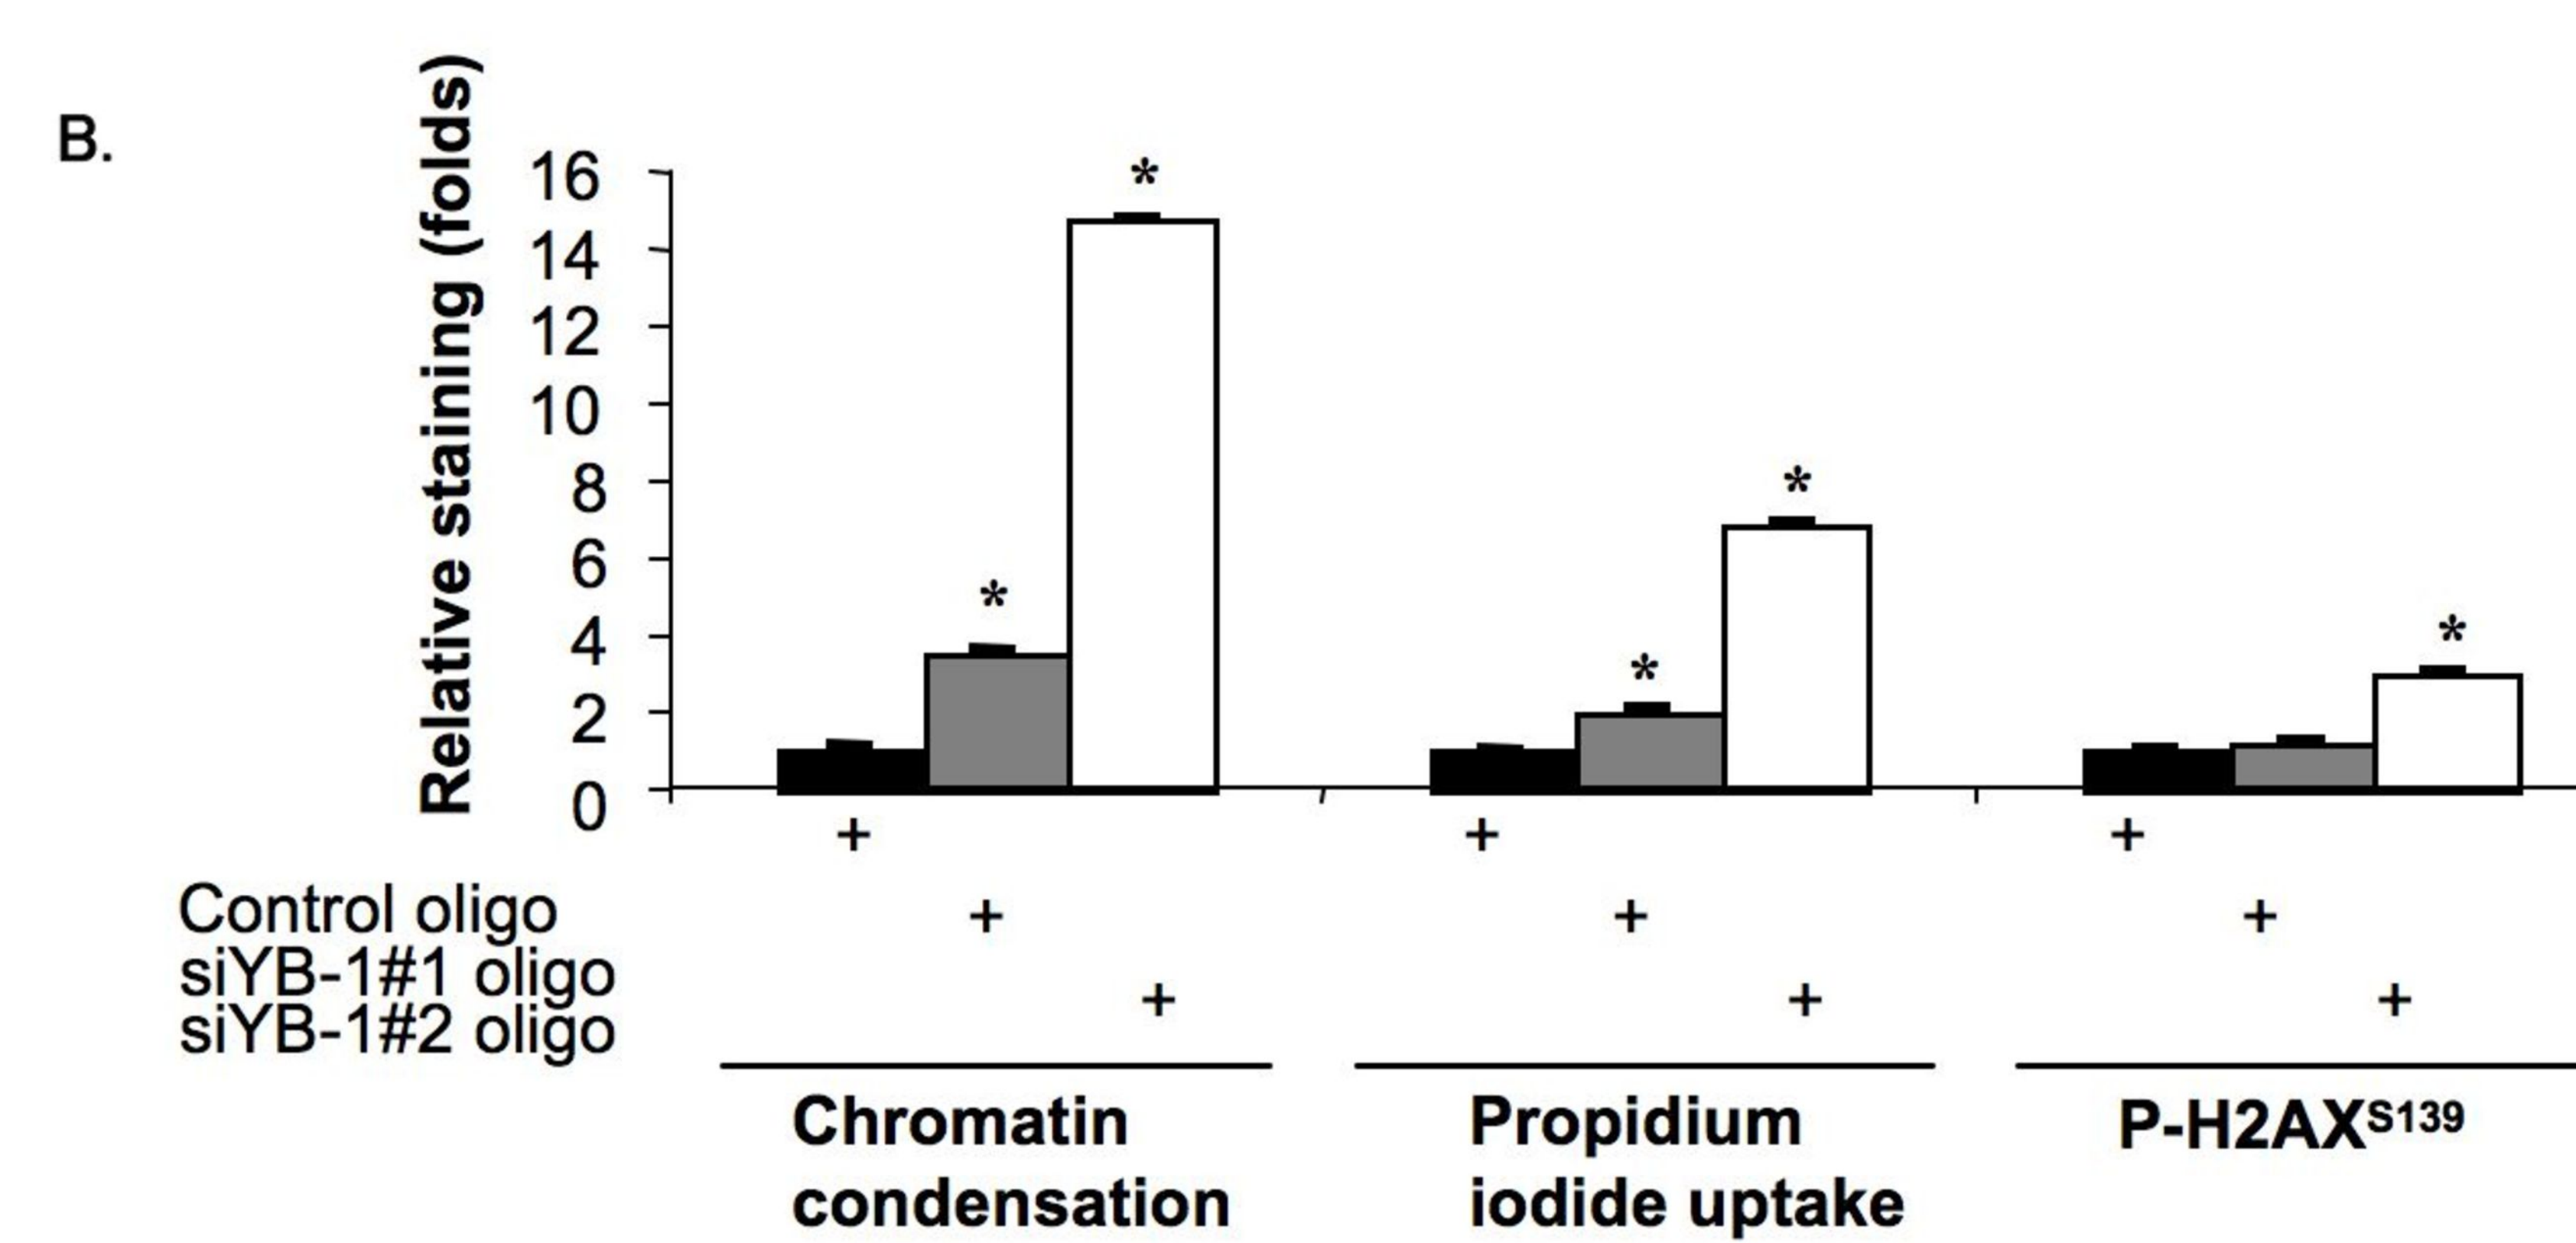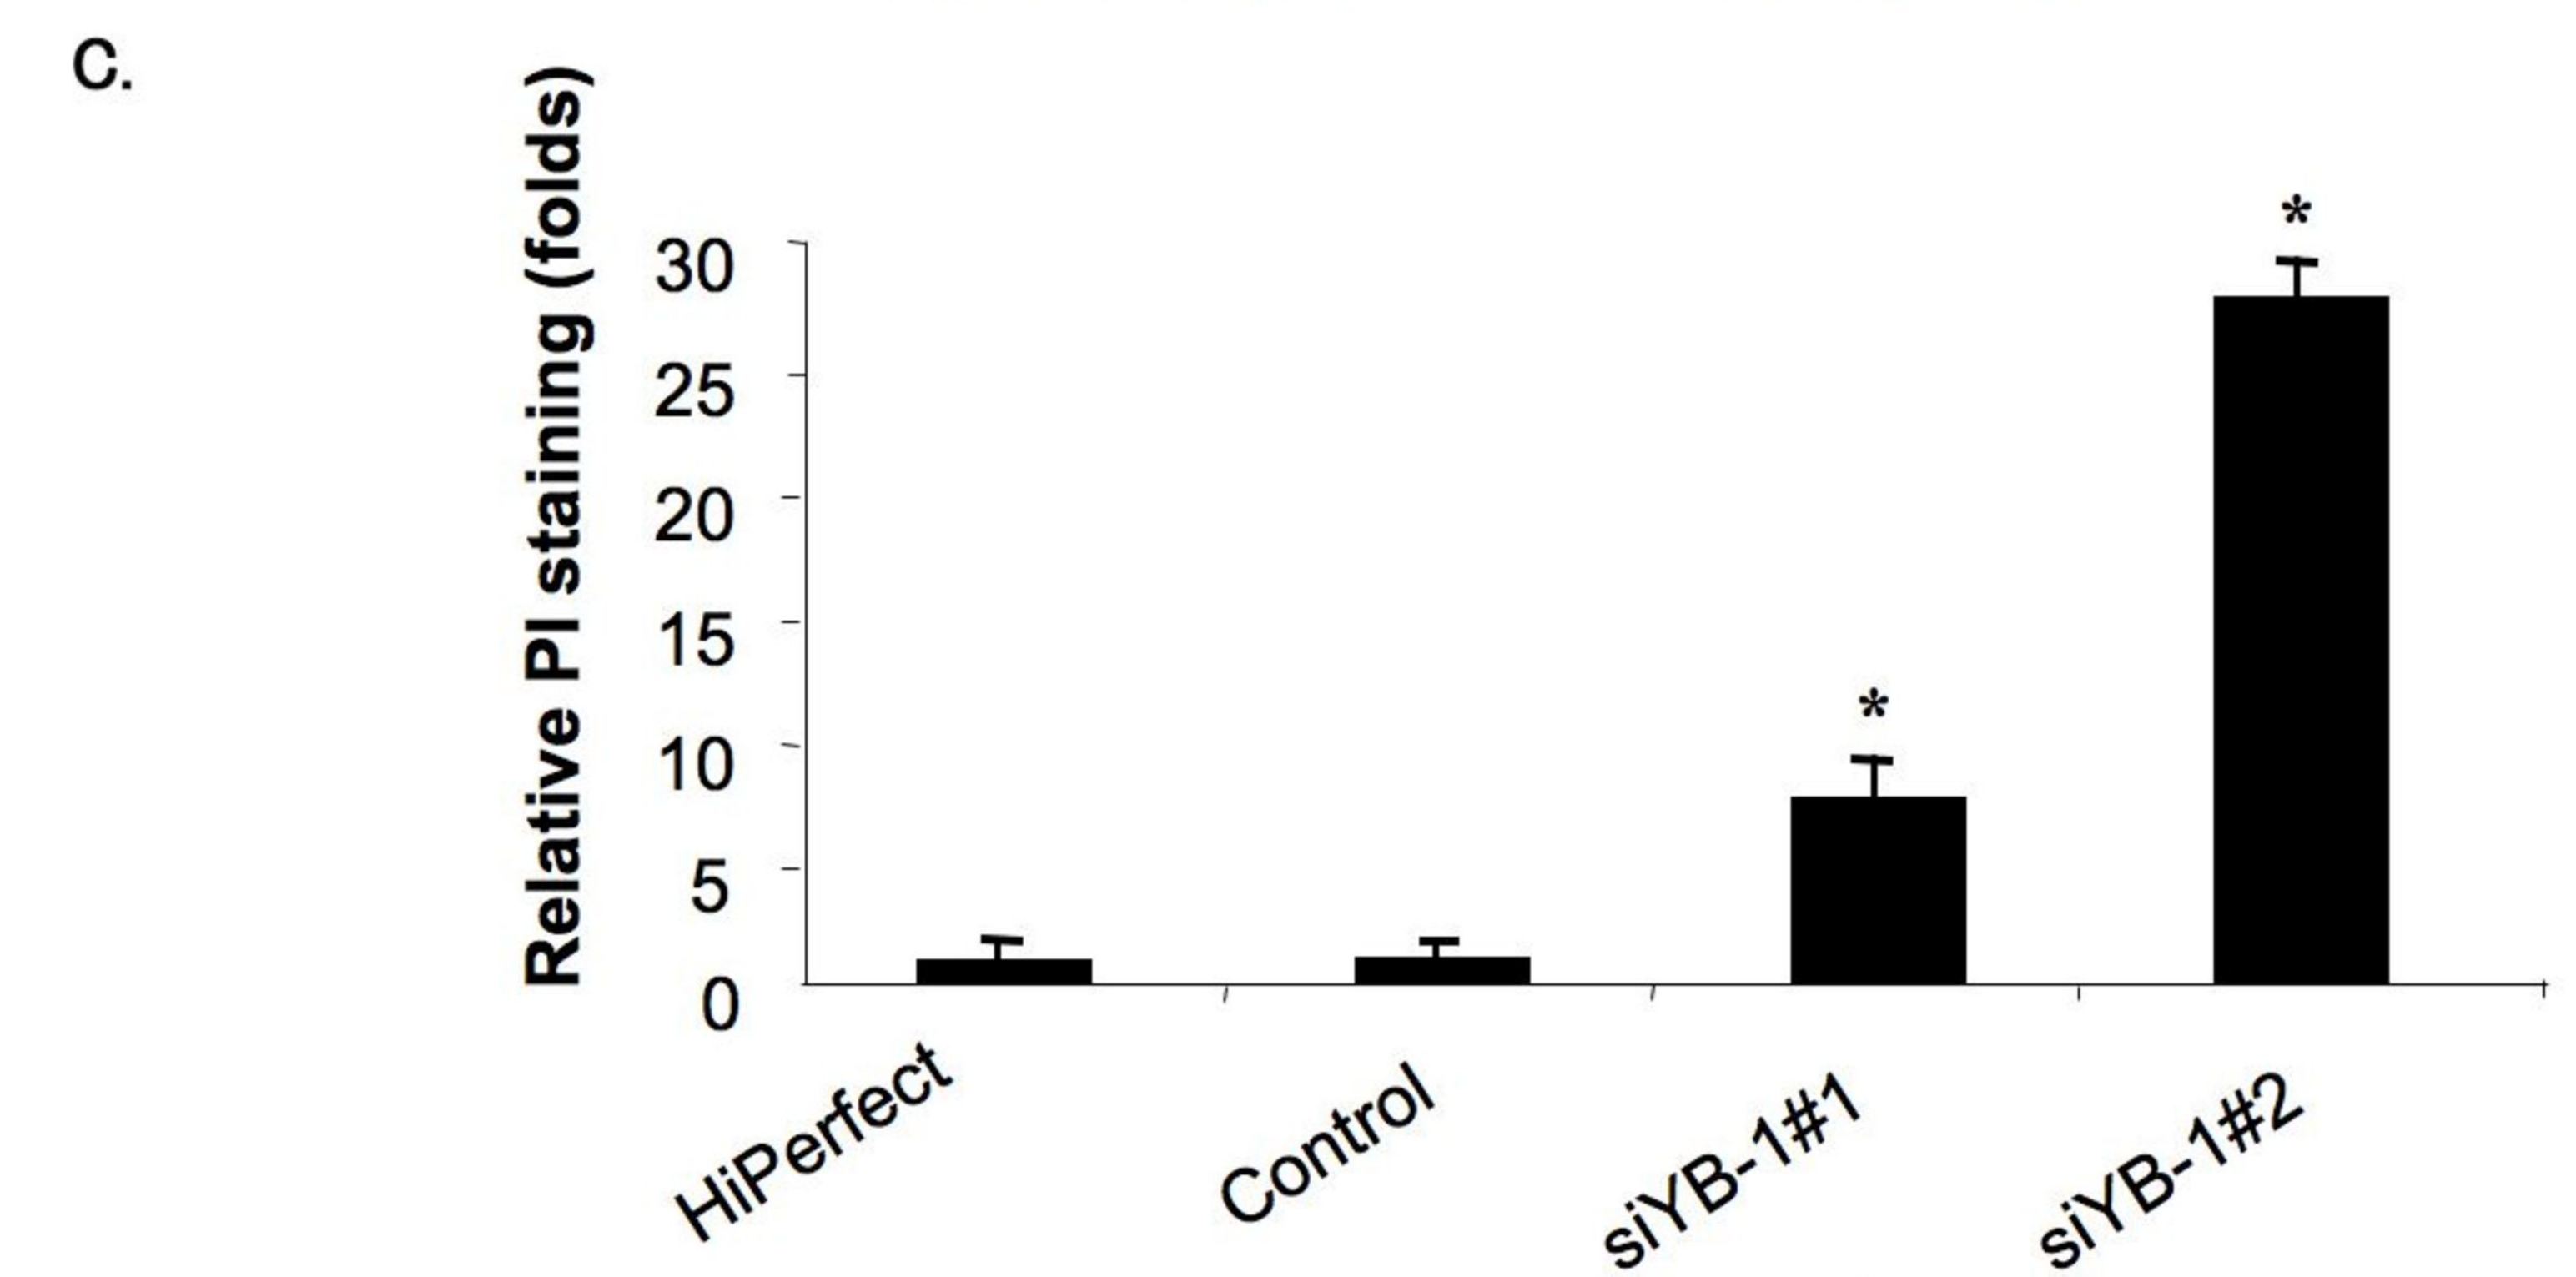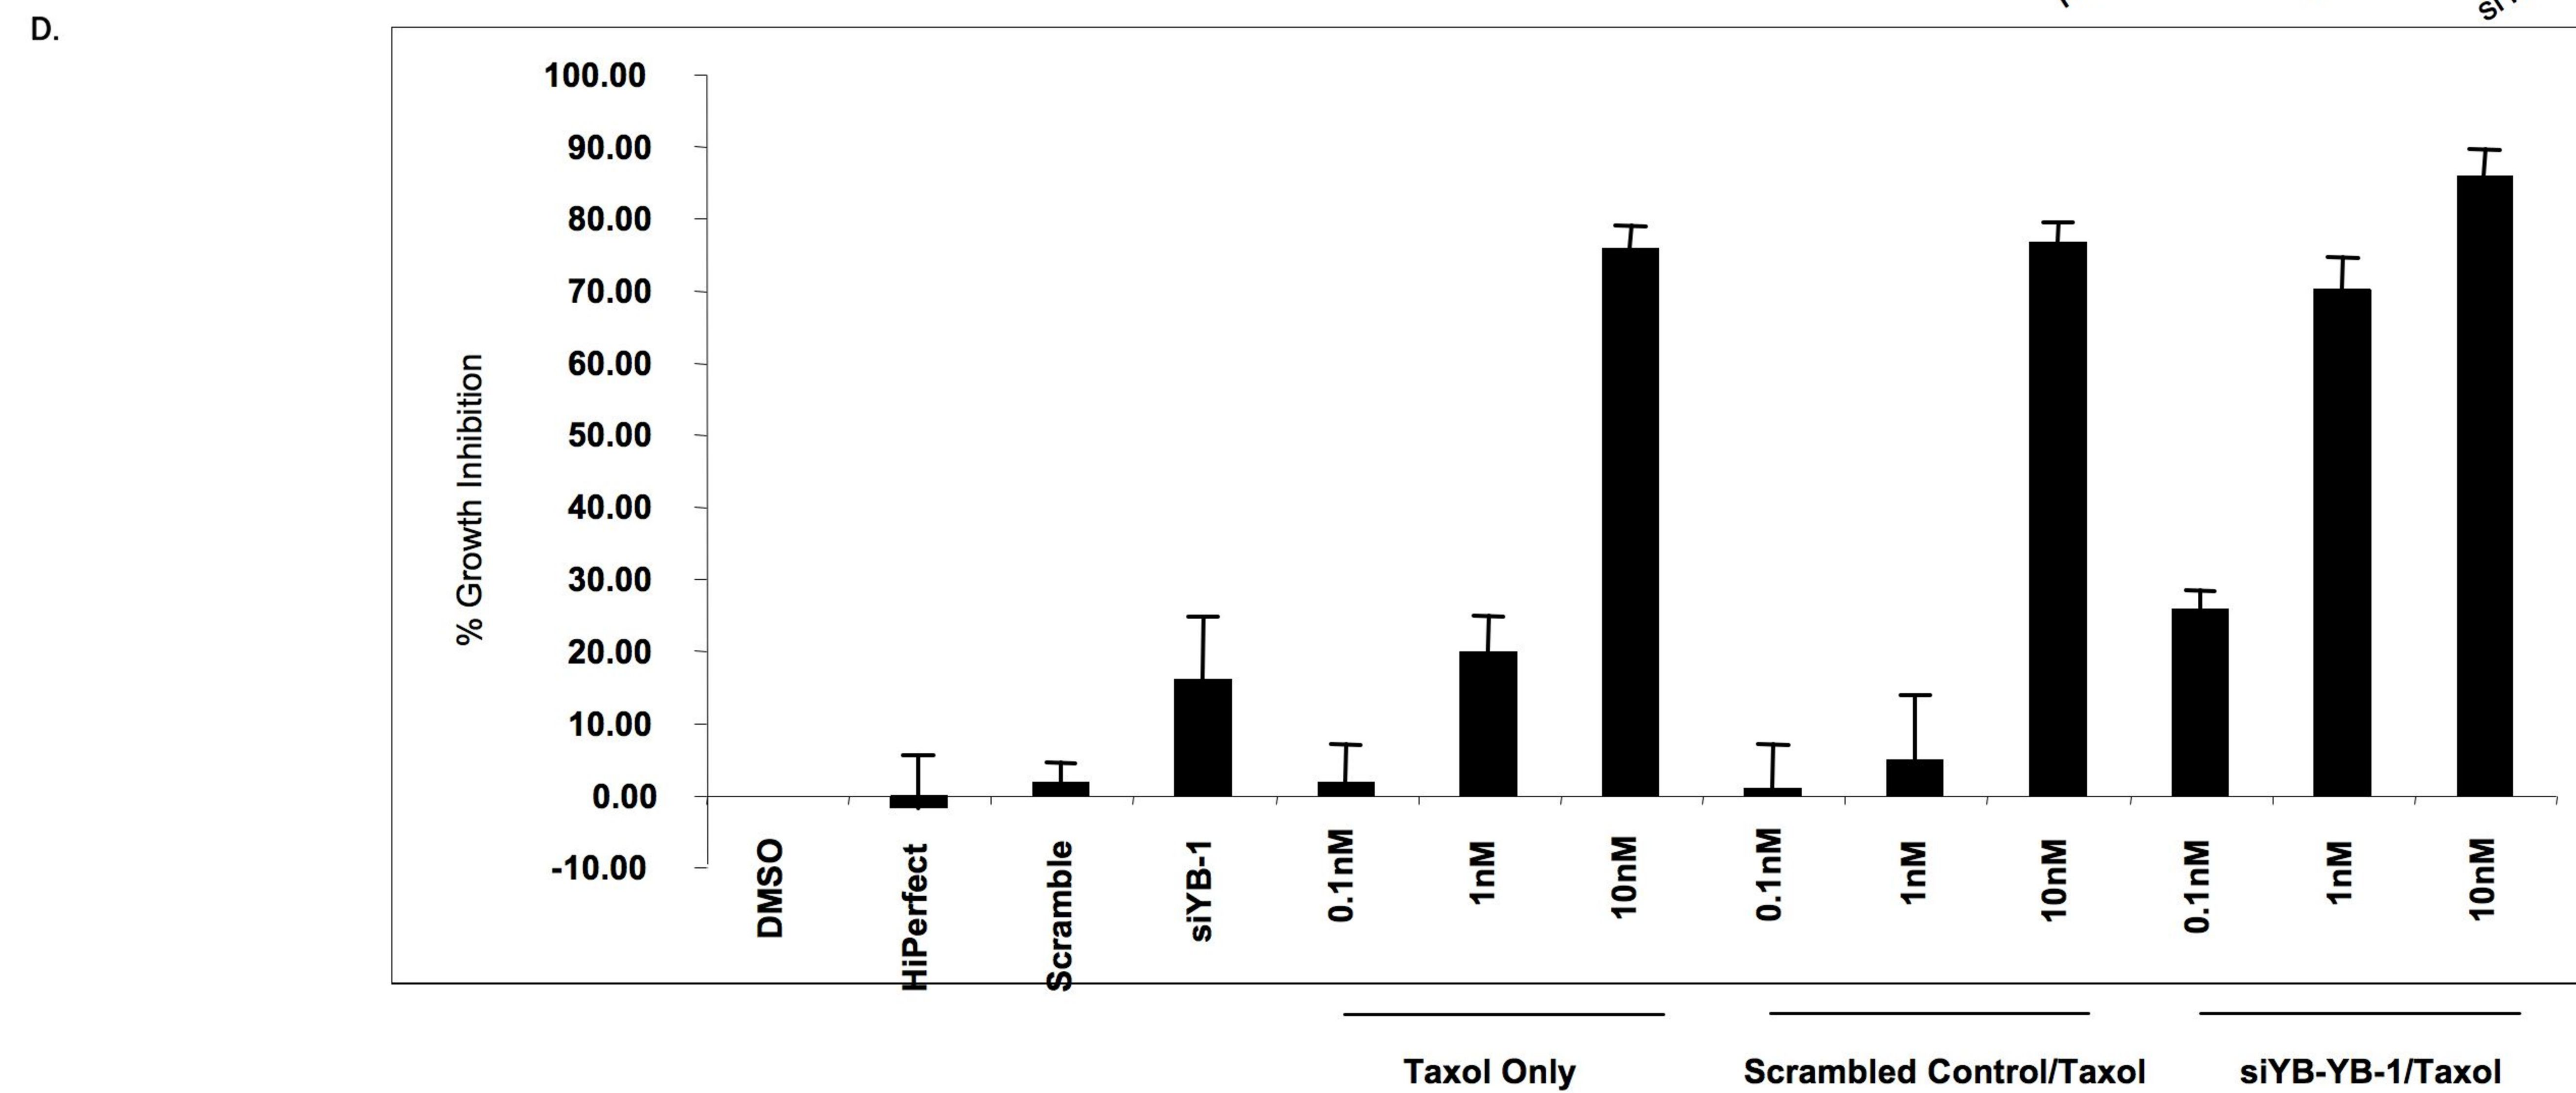

Supplement: sfig_1.pdf [file sfig_1.pdf]
